# Supplementary material for: The Teaching Practices Inventory: A New Tool for Characterizing College and University Teaching in Mathematics and Science
Source: Atypon-hosted journal article supplement (doi:10.1187/cbe.14-02-0023), 2014-09-01
Supplement: combinedsupmats.pdf [file combinedsupmats.pdf]

# Supplemental Material

*CBE—Life Sciences Education*

Wieman *et al.*

**Table S1** (corrected). Category scores for the 31 courses in one department.

| <i>Course #</i>     | I. Course info | II. Supporting materials | III. In class activities | IV. Assignments | V. Feedback & testing | VI. Other (diagnostics, ...) | VII. TA Training & Guidance | VIII. Collaboration | <b>ETP total score</b> |
|---------------------|----------------|--------------------------|--------------------------|-----------------|-----------------------|------------------------------|-----------------------------|---------------------|------------------------|
| 1                   | 5              | 4                        | 13                       | 6               | 7                     | 4                            | 1                           | 3                   | <b>43</b>              |
| 2                   | 2              | 4                        | 7                        | 5               | 11                    | 2                            | 3                           | 5                   | <b>39</b>              |
| 3                   | 6              | 5                        | 11                       | 3               | 9                     | 6                            | 3                           | 3                   | <b>46</b>              |
| 4                   | 2              | 4                        | 7                        | 5               | 11                    | 2                            | 3                           | 5                   | <b>39</b>              |
| 5                   | 4              | 5                        | 8                        | 3               | 8                     | 3                            | 3                           | 1                   | <b>35</b>              |
| 6                   | 4              | 4                        | 9                        | 4               | 6                     | 3                            | 3                           | 5                   | <b>38</b>              |
| 7                   | 2              | 6                        | 4                        | 4               | 6                     | 1                            | 2                           | 1                   | <b>26</b>              |
| 8                   | 5              | 6                        | 6                        | 4               | 8                     | 1                            | 3                           | 3                   | <b>36</b>              |
| 9                   | 4              | 5                        | 1                        | 3               | 8                     | 1                            | 0                           | 3                   | <b>25</b>              |
| 10                  | 4              | 5                        | 3                        | 3               | 9                     | 0                            | 2                           | 2                   | <b>28</b>              |
| 11                  | 4              | 4                        | 3                        | 4               | 7                     | 1                            | 0                           | 5                   | <b>28</b>              |
| 12                  | 0              | 1                        | 2                        | 2               | 2                     | 1                            | 0                           | 2                   | <b>10</b>              |
| 13                  | 4              | 3                        | 9                        | 2               | 6                     | 4                            | 4                           | 3                   | <b>35</b>              |
| 14                  | 4              | 4                        | 7                        | 4               | 9                     | 0                            | 4                           | 1                   | <b>33</b>              |
| 15                  | 5              | 6                        | 8                        | 0               | 8                     | 0                            | 2                           | 5                   | <b>34</b>              |
| 16                  | 4              | 5                        | 9                        | 0               | 8                     | 1                            | 3                           | 2                   | <b>32</b>              |
| 17                  | 3              | 2                        | 3                        | 1               | 6                     | 0                            | 3                           | 4                   | <b>22</b>              |
| 18                  | 4              | 5                        | 5                        | 3               | 8                     | 0                            | 3                           | 1                   | <b>29</b>              |
| 19                  | 1              | 4                        | 4                        | 2               | 7                     | 0                            | 0                           | 0                   | <b>18</b>              |
| 20                  | 4              | 5                        | 6                        | 3               | 8                     | 2                            | 2                           | 2                   | <b>32</b>              |
| 21                  | 1              | 4                        | 0                        | 2               | 9                     | 1                            | 2                           | 0                   | <b>19</b>              |
| 22                  | 6              | 6                        | 12                       | 4               | 11                    | 1                            | 2                           | 4                   | <b>46</b>              |
| 23                  | 5              | 5                        | 10                       | 2               | 9                     | 3                            | 2                           | 2                   | <b>38</b>              |
| 24                  | 6              | 4                        | 4                        | 2               | 9                     | 3                            | 2                           | 2                   | <b>32</b>              |
| 25                  | 5              | 4                        | 4                        | 6               | 9                     | 0                            | 4                           | 3                   | <b>35</b>              |
| 26                  | 4              | 6                        | 8                        | 4               | 10                    | 1                            | 3                           | 5                   | <b>41</b>              |
| 27                  | 1              | 5                        | 4                        | 4               | 10                    | 0                            | 0                           | 4                   | <b>28</b>              |
| 28                  | 4              | 4                        | 4                        | 6               | 9                     | 3                            | 4                           | 3                   | <b>37</b>              |
| 29                  | 6              | 5                        | 9                        | 6               | 9                     | 4                            | 4                           | 5                   | <b>48</b>              |
| 30                  | 4              | 4                        | 4                        | 4               | 9                     | 0                            | 2                           | 2                   | <b>29</b>              |
| 31                  | 2              | 6                        | 6                        | 2               | 6                     | 2                            | 2                           | 4                   | <b>30</b>              |
| <i>Max possible</i> | 6              | 7                        | 15                       | 6               | 13                    | 10                           | 4                           | 6                   | <b>67</b>              |
